# Supplementary material for: Phototropin 1 and 2 Influence Photosynthesis, UV-C Induced Photooxidative Stress Responses, and Cell Death
Source: MDPI journal article supplement (doi:10.3390/cells10020200), 2021-01-20
Supplement: s1 [file s1]

## Supplementary Data

### Phototropin 1 and 2 Influence Photosynthesis, UV-C Induced Photooxidative Stress Responses, and Cell Death

Anna Rusaczek<sup>1,2,\*</sup>, Weronika Czarnocka<sup>1,2</sup>, Patrick Willems<sup>3,4</sup>, Marzena Sujkowska-Rybikowska<sup>1</sup>, Frank Van Breusegem<sup>3,4</sup> and Stanisław Karpiński<sup>2,\*</sup>

<sup>1</sup> Department of Botany, Institute of Biology, Warsaw University of Life Sciences, Nowoursynowska 159, 02-776 Warsaw, Poland; weronika\_czarnocka@sggw.edu.pl (W.C.); marzena\_sujkowska@sggw.edu.pl (M.S.-R.)

<sup>2</sup> Department of Plant Genetics, Breeding and Biotechnology, Institute of Biology, Warsaw University of Life Sciences, Nowoursynowska 159, 02-776 Warsaw, Poland

<sup>3</sup> Department of Plant Biotechnology and Bioinformatics, Ghent University, Technologiepark 71, 9052 Ghent, Belgium; patrick.willems@psb.vib-ugent.be (P.W.); frank.vanbreusegem@psb.vib-ugent.be (F.V.B.)

<sup>4</sup> VIB Center of Plant Systems Biology, Technologiepark 71, 9052 Ghent, Belgium

\* Correspondence: anna\_rusaczek@sggw.edu.pl (A.R.); stanislaw\_karpinski@sggw.edu.pl (S.K.)

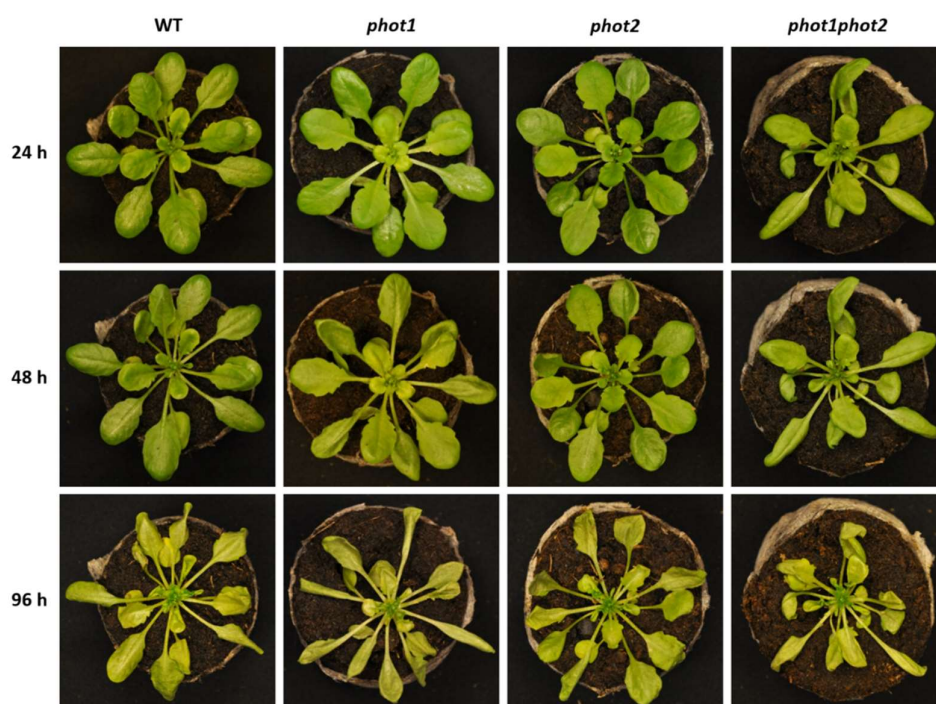

**Figure S1.** Rosette morphology of 4-week-old *Arabidopsis thaliana* wild-type (WT) and phototropin mutants (*phot1*, *phot2*, and *phot1phot2*), in the Col-gl1 background. Pictures were taken for plants 24, 48 and 96 h after UV-C exposure (100 mJ cm<sup>-2</sup>).

**Table S1.** List of genes and their corresponding primers, used for qPCR.

| Gene abbreviation | Gene name                                                   | AGI       | Forward primer           | Reverse primer              |
|-------------------|-------------------------------------------------------------|-----------|--------------------------|-----------------------------|
| <i>5-FCL</i>      | <i>5-FORMYLTETRAHYDROFOLATE CYCLOLIGASE</i>                 | AT5G13050 | GCAAACCTCAATGAACATTTTGG  | GATCGGTTTCATCTGCTTGC        |
| <i>ACD6</i>       | <i>ACCELERATED CELL DEATH 6</i>                             | AT4G14400 | GGGACGAACCTTAAGCAAAA     | CAGAACTGTCCATCGCAAAAC       |
| <i>BCH2</i>       | <i>BETA CAROTENOID HYDROXYLASE 2</i>                        | AT5G52570 | GGCTATAATGGCTGTTTATTACCG | ACATCTCTAACACAGACACTTCACCT  |
| <i>CRK15</i>      | <i>CYSTEINE-RICH RLK (RECEPTOR-LIKE PROTEIN KINASE) 15</i>  | AT4G23230 | CACCACCGCTACCTCCTTC      | CACATTGAAITCCAACCTTTTCC     |
| <i>CRK24</i>      | <i>CYSTEINE-RICH RLK (RECEPTOR-LIKE PROTEIN KINASE) 24</i>  | AT4G23320 | AATATTCGTCCTCGTCAAAAAGA  | GAACAACGATAATCGCCACA        |
| <i>ERD4</i>       | <i>Early-responsive to dehydration stress protein</i>       | AT3G54510 | CCAGGGAATTGCAAAGTATGA    | CAACTGAGCTAAGCCCTGGTA       |
| <i>LHCB1.1</i>    | <i>LIGHT HARVESTING CHLOROPHYLL A/B-BINDING PROTEIN 1.1</i> | AT1G29920 | TGCGGCATCAGAAGTCCT       | TGCCTGATGGACCCCTTTG         |
| <i>LHCB2.1</i>    | <i>LIGHT HARVESTING CHLOROPHYLL A/B-BINDING PROTEIN 2.1</i> | AT2G05100 | AGTCTACTCCTCAAAGCATCTGGT | CGGTTAGGTAGGACGGTGTATT      |
| <i>LHCB2.2</i>    | <i>LIGHT HARVESTING CHLOROPHYLL A/B-BINDING PROTEIN 2.2</i> | AT2G05070 | TACTCCCCAAAGCATCTGGT     | CCGGGGTATTCTCCAGTTAAG       |
| <i>LHCB2.4</i>    | <i>LIGHT HARVESTING CHLOROPHYLL A/B-BINDING PROTEIN 2.4</i> | AT3G27690 | GCGTCGTACCGTCAAGTCTAC    | GGAAAATGGTCTAGGTATTTGG      |
| <i>PHOT1</i>      | <i>PHOTOTROPIN 1</i>                                        | AT3G45780 | CAACGAAATTCGCGAGAAAA     | TCGTCTATAGATTTCATCCAAAAGATT |
| <i>PHOT2</i>      | <i>PHOTOTROPIN 2</i>                                        | AT5G58140 | GCTACCACTCTTGAGCGCATA    | CAAGAAAGCTGTCTGATGCAAA      |
| <i>PP2AA2</i>     | <i>PROTEIN PHOSPHATASE 2A SUBUNIT A2</i>                    | AT3G25800 | TGCAATGGTTACAAGACAAGGTT  | GCATTGCCCATTCAGGAC          |
| <i>PR2</i>        | <i>PATHOGENESIS-RELATED PROTEIN 2</i>                       | AT3G57260 | GCTTAGCCTCACCAACAATG     | CCCGTAGCATACTCCGATTT        |
| <i>YLS8</i>       | <i>YELLOW-LEAF-SPECIFIC GENE 8</i>                          | AT5G08290 | TTACTGTTTCGGTTGTCTCCATTT | CACTGAATCATGTTCGAAGCAAGT    |
